# Supplementary material for: Seasonal Variation in Gut Microbiota of the Wild Daurian Ground Squirrel (Spermophilus dauricus): Metagenomic Insights into Seasonal Breeding
Source: MDPI journal article supplement (doi:10.3390/ani13132235), 2023-07-07
Supplement: s1 [file s1]

**Method 1.** Content for Enzymic Universal DNaseq Library Prep Kit (Kaitai Bio-Technology Co., Ltd., Hangzhou, China)

| Content              | AT4107-01<br>(6 preps) |
|----------------------|------------------------|
| DNA frag Buffer      | 15 uL                  |
| DNA frag Enzyme      | 30 uL                  |
| DNA Ligation Buffer  | 24 uL                  |
| DNA Ligation Enzyme  | 6 uL                   |
| DNA Universal ADT    | 6 uL                   |
| 2 x PCR Mix          | 150 uL                 |
| DNA-Universal Primer | 12 uL                  |

**Method 2.** Raw data obtained by sequencing using Illumina sequencing platform has a certain proportion of low-quality data. In order to ensure the accuracy and reliability of the results of subsequent analysis, the raw sequencing data need to be pre-processed by fastp[1], the specific processing steps are as follows:

- (1) Remove the adapter sequence from sequencing reads;
- (2) Scanning of sequencing reads by sliding window method, with a default scan window of 6 bp, and cutting off the portion of the read from the beginning of the window to the 3' termination when the average quality value in the window is below 20;
- (3) Remove the reads containing more than 40% of unqualified bases (mass <= 15);
- (4) Remove sequences less than 100bp in length;
- (5) Remove sequences with more than 5% N content;
- (6) Use Bowtie 2[2] to compare with host sequences and filter out reads that may be from the host.

## References

1. Chen, S.; Zhou, Y.; Chen, Y.; Gu, J. fastp: an ultra-fast all-in-one FASTQ preprocessor. *Bioinformatics* **2018**, *34*, i884-i890, doi:10.1093/bioinformatics/bty560.
2. Langmead, B.; Salzberg, S.L. Fast gapped-read alignment with Bowtie 2. *Nature Methods* **2012**, *9*, 357-359, doi:10.1038/nmeth.1923.
