# Supplementary material for: Seasonal Variation in Gut Microbiota of the Wild Daurian Ground Squirrel (Spermophilus dauricus): Metagenomic Insights into Seasonal Breeding
Source: MDPI journal article supplement (doi:10.3390/ani13132235), 2023-07-07
Supplement: s1 [file s1]

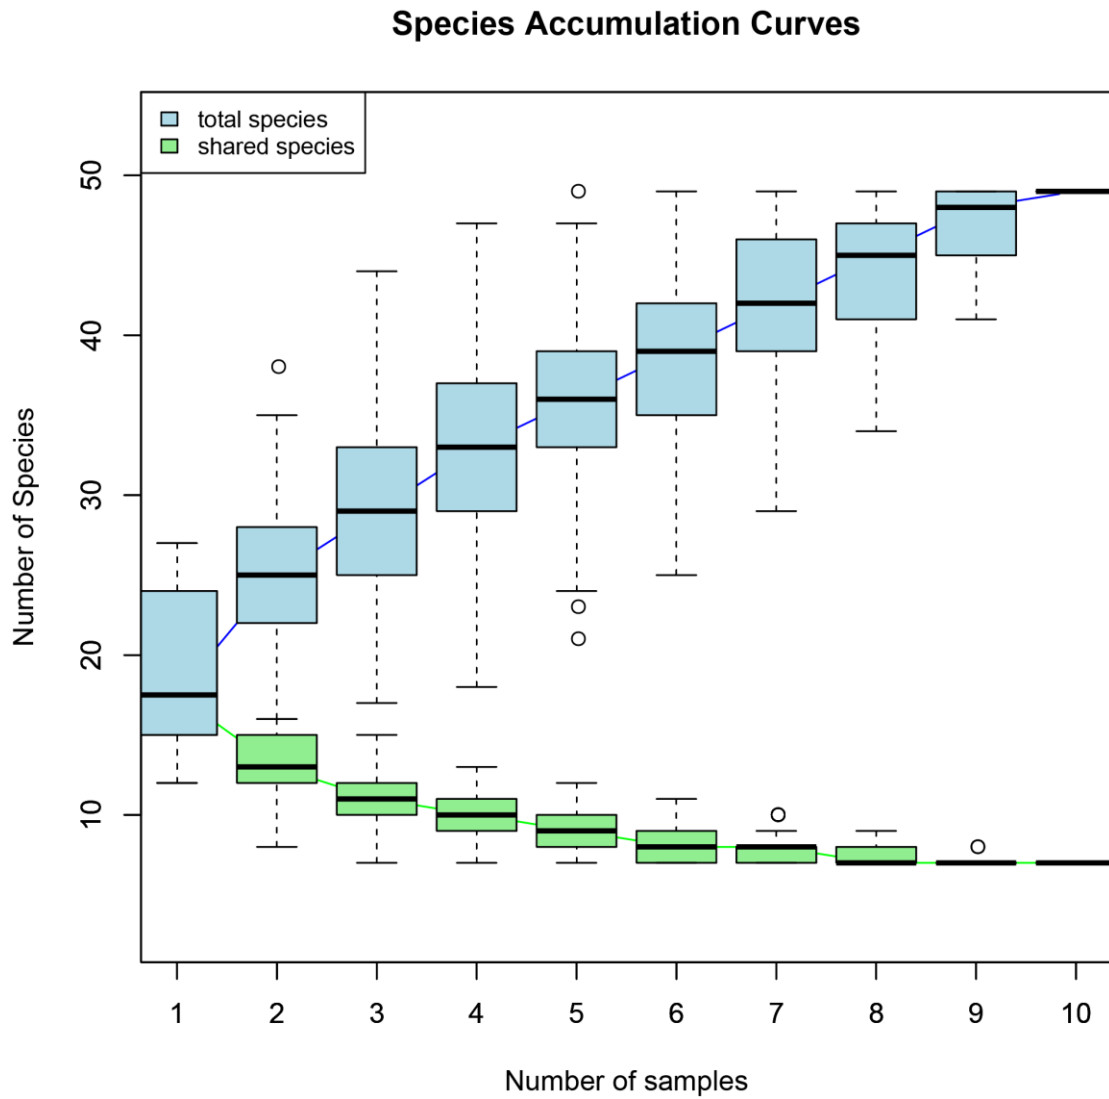

Figure S1 The species accumulation curves. The horizontal axis is the number of samples and the vertical axis is the number of total and shared species at different sample sizes ( “○” represent outliers).
