# Supplementary material for: Seasonal Variation in Gut Microbiota of the Wild Daurian Ground Squirrel (Spermophilus dauricus): Metagenomic Insights into Seasonal Breeding
Source: MDPI journal article supplement (doi:10.3390/ani13132235), 2023-07-07
Supplement: s1 [file s1]

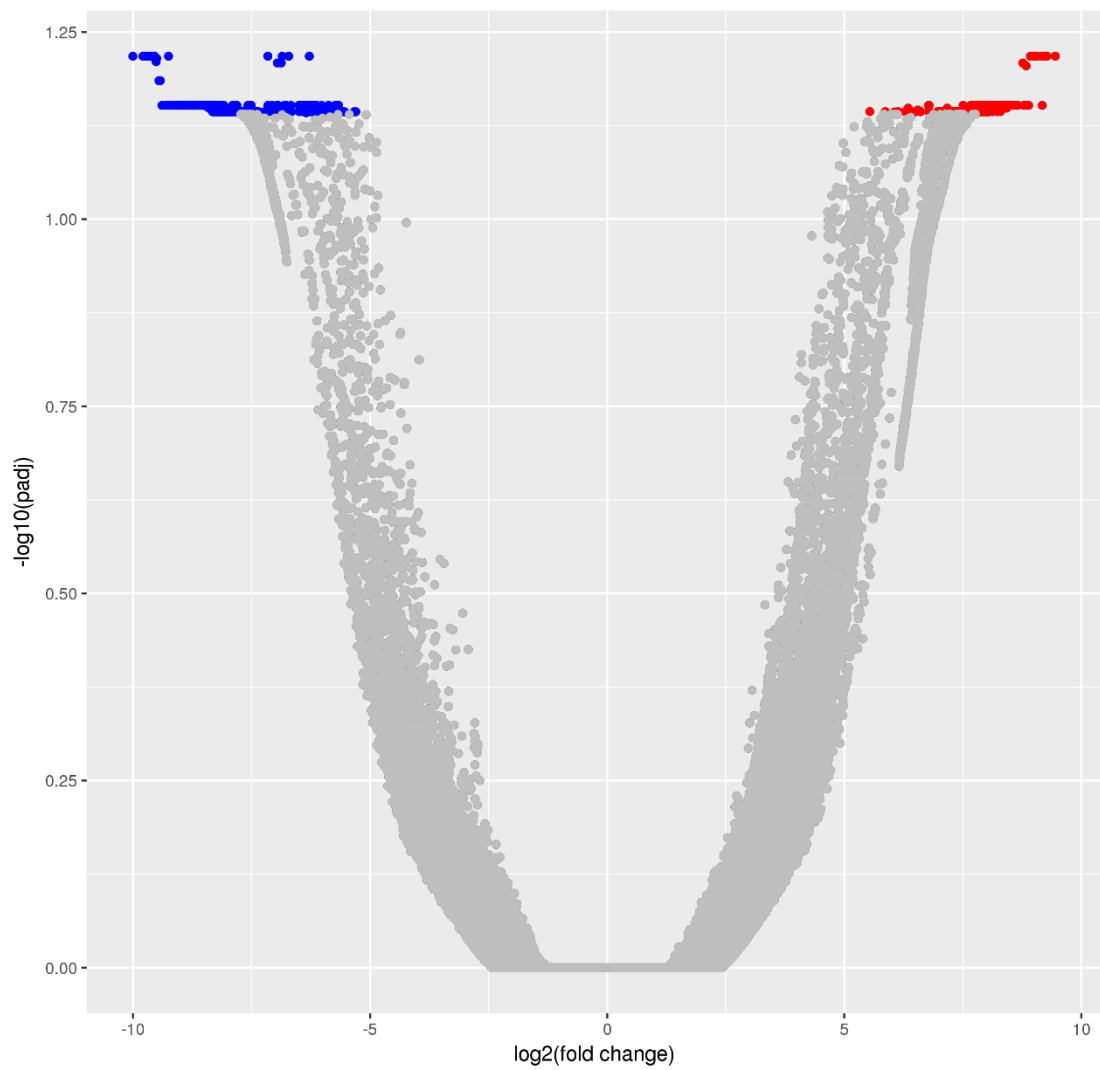

Figure S2 The volcano map of gene expression between groups. Horizontal coordinates indicate  $\log_2(\text{fold change})$  of genes in the breeding and non-breeding seasons; vertical coordinates indicate negative log values of P-adjust values for gene expression changes. Red points represent genes that are down-regulated during the breeding season, and blue points represent genes that are up-regulated during the breeding season.
